# Supplementary material
Source: publisher figshare collection journal article supplement (https://acs.figshare.com/ndownloader/files/4562053)
Supplement: Supplementary file 1 [file 4562053]

  
data_z:\s2797\work\s2797abs 
  
_audit_creation_method            SHELXL-97 
_chemical_name_systematic 
; 
 ? 
; 
#------------------------------------------------------------------------------ 
_publ_requested_journal               ' ENTER JOURNAL NAME HERE' 
  
_publ_contact_author 
; 
    Madeleine Helliwell 
; 
_publ_contact_letter 
; 
    ENTER TEXT OF LETTER 
; 
  
_publ_requested_coeditor_name          ? 
_publ_contact_author_phone            ' ENTER PHONE NUMBER ' 
_publ_contact_author_fax              ' ENTER FAX NUMBER ' 
_publ_contact_author_email            ' ENTER EMAIL ADDRESS ' 
loop_ 
_publ_author_name 
_publ_author_address 
' FIRST AUTHORS NAME ' 
; 
  FIRST AUTHORS ADDRESS 
; 
  
_publ_section_title 
; 
    ENTER SECTION TITLE 
; 
  
_publ_section_abstract 
; 
    ENTER ABSTRACT 
; 
  
_publ_section_exptl_prep 
; 
    ENTER EXPERIMENTAL SECTION 
; 
  
_publ_section_exptl_refinement 
; 
  
The structure was solved by the direct methods
and there are 4 molecules in the asymmetric unit. 
All non-H atoms were refined anisotropically. 
H atoms were included in calculated positions. 
The absolute configuration was determined by refining the 
Flack paramter.  
  
  
; 
  
_publ_section_comment 
; 
    ENTER TEXT 
; 
  
_publ_section_references 
; 
Bruker (2001). <i>SMART</i> (Version 5.625), <i>SADABS</i> (Version 2.03a) and
<i>SHELXTL</i> (Version 6.12). Bruker AXS Inc., Madison, Wisconsin, USA.

Bruker (2002). <i>SAINT</i>. Version 6.36a. Bruker AXS Inc., Madison,
Wisconsin, USA.

M. C. Burla, R. Caliandro, M. Camalli, B. Carrozzini, 
 G. L. Cascarano, L. De Caro,C. Giacovazzo, G. Polidori 
 and R. Spagna 
 SIR2004: an improved tool for crystal structure determination 
 and refinement 
 J. Appl. Cryst. (2005). 38, 381-388 

Sheldrick, G. M. (1997). SHELXS-97 and SHELXL-97.
University of G\"ottingen, Germany.

Sheldrick, G, M. (2005). CELL_NOW. University
of G\"ottingen, Germany.

Sheldrick, G, M. (2007). TWINABS. University
of G\"ottingen, Germany.

Spek, A.L. (2003) J.Appl.Cryst. 36, 2003, 7-13. 
;
_chemical_name_common             ? 
_chemical_melting_point           ? 
_chemical_formula_moiety          ? 
_chemical_formula_sum 
 'C26 H19 N O S' 
_chemical_formula_weight          393.48 
  
loop_ 
 _atom_type_symbol 
 _atom_type_description 
 _atom_type_scat_dispersion_real 
 _atom_type_scat_dispersion_imag 
 _atom_type_scat_source 
 'C'  'C'   0.0033   0.0016 
 'International Tables Vol C Tables 4.2.6.8 and 6.1.1.4' 
 'H'  'H'   0.0000   0.0000 
 'International Tables Vol C Tables 4.2.6.8 and 6.1.1.4' 
 'N'  'N'   0.0061   0.0033 
 'International Tables Vol C Tables 4.2.6.8 and 6.1.1.4' 
 'O'  'O'   0.0106   0.0060 
 'International Tables Vol C Tables 4.2.6.8 and 6.1.1.4' 
 'S'  'S'   0.1246   0.1234 
 'International Tables Vol C Tables 4.2.6.8 and 6.1.1.4' 
  
_symmetry_cell_setting            Triclinic 
_symmetry_space_group_name_H-M    P1 
  
loop_ 
 _symmetry_equiv_pos_as_xyz 
 'x, y, z' 
  
_cell_length_a                    10.5676(18) 
_cell_length_b                    13.375(2) 
_cell_length_c                    15.023(3) 
_cell_angle_alpha                 103.159(3) 
_cell_angle_beta                  95.365(2) 
_cell_angle_gamma                 106.548(2) 
_cell_volume                      1953.3(6) 
_cell_formula_units_Z             4 
_cell_measurement_temperature     100(2) 
_cell_measurement_reflns_used     951 
_cell_measurement_theta_min       2.55 
_cell_measurement_theta_max       26.28 
  
_exptl_crystal_description        irregular 
_exptl_crystal_colour             colourless 
_exptl_crystal_size_max           0.40 
_exptl_crystal_size_mid           0.30 
_exptl_crystal_size_min           0.30 
_exptl_crystal_density_meas       ?
_exptl_crystal_density_diffrn     1.338 
_exptl_crystal_density_method     'not measured' 
_exptl_crystal_F_000              824 
_exptl_absorpt_coefficient_mu     0.183 
_exptl_absorpt_correction_type    multi-scan
_exptl_absorpt_correction_T_min   0.937 
_exptl_absorpt_correction_T_max   1.000 
_exptl_absorpt_process_details    'SADABS'
  
_exptl_special_details 
; 
 ? 
; 
  
_diffrn_ambient_temperature       100(2) 
_diffrn_radiation_wavelength      0.71073 
_diffrn_radiation_type            MoK\a 
_diffrn_radiation_source          'fine-focus sealed tube' 
_diffrn_radiation_monochromator   graphite 
_diffrn_measurement_device_type   'CCD area detector' 
_diffrn_measurement_method        'phi and omega scans' 
_diffrn_detector_area_resol_mean  ? 
_diffrn_standards_number          ? 
_diffrn_standards_interval_count  ? 
_diffrn_standards_interval_time   ? 
_diffrn_standards_decay_%         ? 
_diffrn_reflns_number             15602 
_diffrn_reflns_av_R_equivalents   0.0137 
_diffrn_reflns_av_sigmaI/netI     0.0315 
_diffrn_reflns_limit_h_min        -13 
_diffrn_reflns_limit_h_max        12 
_diffrn_reflns_limit_k_min        -16 
_diffrn_reflns_limit_k_max        16 
_diffrn_reflns_limit_l_min        -18 
_diffrn_reflns_limit_l_max        18 
_diffrn_reflns_theta_min          1.65 
_diffrn_reflns_theta_max          26.38 
_reflns_number_total              13884 
_reflns_number_gt                 13644 
_reflns_threshold_expression      >2sigma(I) 
  
_computing_data_collection        'Bruker SMART' 
_computing_cell_refinement        'Bruker SMART' 
_computing_data_reduction         'Bruker SAINT' 
_computing_structure_solution     'SHELXS-97 (Sheldrick, 1990)' 
_computing_structure_refinement   'SHELXL-97 (Sheldrick, 1997)' 
_computing_molecular_graphics     'Bruker SHELXTL' 
_computing_publication_material   'Bruker SHELXTL' 
  
_refine_special_details 
; 
 Refinement of F^2^ against ALL reflections.  The weighted R-factor wR and 
 goodness of fit S are based on F^2^, conventional R-factors R are based 
 on F, with F set to zero for negative F^2^. The threshold expression of 
 F^2^ > 2sigma(F^2^) is used only for calculating R-factors(gt) etc. and is 
 not relevant to the choice of reflections for refinement.  R-factors based 
 on F^2^ are statistically about twice as large as those based on F, and R- 
 factors based on ALL data will be even larger. 
; 
  
_refine_ls_structure_factor_coef  Fsqd 
_refine_ls_matrix_type            full 
_refine_ls_weighting_scheme       calc 
_refine_ls_weighting_details 
 'calc w=1/[\s^2^(Fo^2^)+(0.0427P)^2^+0.4464P] where P=(Fo^2^+2Fc^2^)/3' 
_atom_sites_solution_primary      direct 
_atom_sites_solution_secondary    difmap 
_atom_sites_solution_hydrogens    geom 
_refine_ls_hydrogen_treatment     constr
_refine_ls_extinction_method      none 
_refine_ls_extinction_coef        ? 
_refine_ls_abs_structure_details 
 'Flack H D (1983), Acta Cryst. A39, 876-881' 
_refine_ls_abs_structure_Flack    0.05(3) 
_refine_ls_number_reflns          13884 
_refine_ls_number_parameters      1049 
_refine_ls_number_restraints      3 
_refine_ls_R_factor_all           0.0322 
_refine_ls_R_factor_gt            0.0316 
_refine_ls_wR_factor_ref          0.0800 
_refine_ls_wR_factor_gt           0.0795 
_refine_ls_goodness_of_fit_ref    1.047 
_refine_ls_restrained_S_all       1.047 
_refine_ls_shift/su_max           0.005 
_refine_ls_shift/su_mean          0.000 
  
loop_ 
 _atom_site_label 
 _atom_site_type_symbol 
 _atom_site_fract_x 
 _atom_site_fract_y 
 _atom_site_fract_z 
 _atom_site_U_iso_or_equiv 
 _atom_site_adp_type 
 _atom_site_occupancy 
 _atom_site_symmetry_multiplicity 
 _atom_site_calc_flag 
 _atom_site_refinement_flags 
 _atom_site_disorder_assembly 
 _atom_site_disorder_group 
S1 S 0.41529(4) 0.85197(4) 0.67128(3) 0.01992(10) Uani 1 1 d . . . 
O1 O 0.37779(14) 0.77020(12) 0.57915(10) 0.0279(3) Uani 1 1 d . . . 
N1 N 0.27025(16) 0.83159(13) 0.86182(12) 0.0217(3) Uani 1 1 d . . . 
C1 C 0.49417(18) 0.79498(15) 0.75037(13) 0.0185(4) Uani 1 1 d . . . 
C2 C 0.48712(18) 0.82217(15) 0.84280(14) 0.0184(4) Uani 1 1 d . . . 
C3 C 0.55674(18) 0.77938(15) 0.90350(14) 0.0190(4) Uani 1 1 d . . . 
C4 C 0.55534(19) 0.80347(16) 1.00039(14) 0.0222(4) Uani 1 1 d . . . 
H4 H 0.5040 0.8472 1.0261 0.027 Uiso 1 1 calc R . . 
C5 C 0.6263(2) 0.76494(17) 1.05728(15) 0.0267(4) Uani 1 1 d . . . 
H5 H 0.6247 0.7826 1.1220 0.032 Uiso 1 1 calc R . . 
C6 C 0.7020(2) 0.69894(17) 1.02039(16) 0.0290(5) Uani 1 1 d . . . 
H6 H 0.7541 0.6748 1.0606 0.035 Uiso 1 1 calc R . . 
C7 C 0.7005(2) 0.66974(17) 0.92726(16) 0.0267(4) Uani 1 1 d . . . 
H7 H 0.7484 0.6223 0.9029 0.032 Uiso 1 1 calc R . . 
C8 C 0.62868(19) 0.70897(15) 0.86582(14) 0.0210(4) Uani 1 1 d . . . 
C9 C 0.62607(19) 0.67975(16) 0.76882(15) 0.0237(4) Uani 1 1 d . . . 
H9 H 0.6704 0.6302 0.7431 0.028 Uiso 1 1 calc R . . 
C10 C 0.56105(19) 0.72171(16) 0.71201(14) 0.0215(4) Uani 1 1 d . . . 
H10 H 0.5604 0.7021 0.6471 0.026 Uiso 1 1 calc R . . 
C11 C 0.39957(18) 0.88584(15) 0.88126(13) 0.0177(4) Uani 1 1 d . . . 
C12 C 0.45378(18) 0.99409(15) 0.93920(13) 0.0173(4) Uani 1 1 d . . . 
C13 C 0.59249(19) 1.05390(16) 0.95724(13) 0.0209(4) Uani 1 1 d . . . 
H13 H 0.6540 1.0225 0.9292 0.025 Uiso 1 1 calc R . . 
C14 C 0.6377(2) 1.15651(17) 1.01486(15) 0.0255(4) Uani 1 1 d . . . 
H14 H 0.7304 1.1963 1.0263 0.031 Uiso 1 1 calc R . . 
C15 C 0.5470(2) 1.20380(17) 1.05764(14) 0.0270(4) Uani 1 1 d . . . 
H15 H 0.5798 1.2747 1.0984 0.032 Uiso 1 1 calc R . . 
C16 C 0.4133(2) 1.14907(17) 1.04114(14) 0.0243(4) Uani 1 1 d . . . 
H16 H 0.3537 1.1823 1.0698 0.029 Uiso 1 1 calc R . . 
C17 C 0.3628(2) 1.04286(16) 0.98140(13) 0.0198(4) Uani 1 1 d . . . 
C18 C 0.2255(2) 0.98221(17) 0.96033(14) 0.0227(4) Uani 1 1 d . . . 
H18 H 0.1617 1.0114 0.9875 0.027 Uiso 1 1 calc R . . 
C19 C 0.1853(2) 0.88169(17) 0.90082(14) 0.0226(4) Uani 1 1 d . . . 
H19 H 0.0920 0.8438 0.8854 0.027 Uiso 1 1 calc R . . 
C20 C 0.56520(19) 0.95380(16) 0.66418(13) 0.0196(4) Uani 1 1 d . . . 
C21 C 0.6004(2) 1.05635(16) 0.72370(14) 0.0223(4) Uani 1 1 d . . . 
H21 H 0.5466 1.0731 0.7685 0.027 Uiso 1 1 calc R . . 
C22 C 0.7157(2) 1.13489(16) 0.71734(14) 0.0230(4) Uani 1 1 d . . . 
H22 H 0.7399 1.2057 0.7578 0.028 Uiso 1 1 calc R . . 
C23 C 0.7960(2) 1.11140(17) 0.65265(14) 0.0235(4) Uani 1 1 d . . . 
C24 C 0.7577(2) 1.00740(17) 0.59306(14) 0.0252(4) Uani 1 1 d . . . 
H24 H 0.8117 0.9901 0.5486 0.030 Uiso 1 1 calc R . . 
C25 C 0.6420(2) 0.92875(17) 0.59768(14) 0.0234(4) Uani 1 1 d . . . 
H25 H 0.6156 0.8586 0.5558 0.028 Uiso 1 1 calc R . . 
C26 C 0.9212(2) 1.19580(18) 0.64554(16) 0.0301(5) Uani 1 1 d . . . 
H26A H 0.9067 1.2180 0.5886 0.045 Uiso 1 1 calc R . . 
H26B H 0.9955 1.1656 0.6440 0.045 Uiso 1 1 calc R . . 
H26C H 0.9430 1.2588 0.6994 0.045 Uiso 1 1 calc R . . 
S2 S -0.15496(5) 0.76609(4) 0.28002(3) 0.02269(10) Uani 1 1 d . . . 
O2 O -0.29776(14) 0.76340(14) 0.27200(10) 0.0322(4) Uani 1 1 d . . . 
N2 N 0.03870(17) 0.81799(14) 0.11745(12) 0.0251(4) Uani 1 1 d . . . 
C27 C -0.05762(19) 0.90709(16) 0.30266(13) 0.0206(4) Uani 1 1 d . . . 
C28 C 0.05812(19) 0.93560(16) 0.26686(13) 0.0186(4) Uani 1 1 d . . . 
C29 C 0.1352(2) 1.04770(16) 0.28765(13) 0.0204(4) Uani 1 1 d . . . 
C30 C 0.2555(2) 1.08341(16) 0.25321(14) 0.0238(4) Uani 1 1 d . . . 
H30 H 0.2870 1.0321 0.2147 0.029 Uiso 1 1 calc R . . 
C31 C 0.3272(2) 1.19152(17) 0.27488(15) 0.0272(4) Uani 1 1 d . . . 
H31 H 0.4087 1.2143 0.2522 0.033 Uiso 1 1 calc R . . 
C32 C 0.2804(2) 1.26900(17) 0.33070(15) 0.0298(5) Uani 1 1 d . . . 
H32 H 0.3297 1.3437 0.3446 0.036 Uiso 1 1 calc R . . 
C33 C 0.1650(2) 1.23698(17) 0.36466(14) 0.0274(5) Uani 1 1 d . . . 
H33 H 0.1351 1.2898 0.4028 0.033 Uiso 1 1 calc R . . 
C34 C 0.0886(2) 1.12627(17) 0.34404(13) 0.0226(4) Uani 1 1 d . . . 
C35 C -0.0341(2) 1.09179(18) 0.37661(14) 0.0265(4) Uani 1 1 d . . . 
H35 H -0.0666 1.1441 0.4129 0.032 Uiso 1 1 calc R . . 
C36 C -0.1059(2) 0.98486(18) 0.35654(14) 0.0249(4) Uani 1 1 d . . . 
H36 H -0.1880 0.9627 0.3786 0.030 Uiso 1 1 calc R . . 
C37 C 0.10310(19) 0.85275(15) 0.20361(13) 0.0197(4) Uani 1 1 d . . . 
C38 C 0.20787(19) 0.81704(15) 0.23738(14) 0.0195(4) Uani 1 1 d . . . 
C39 C 0.27125(19) 0.85097(16) 0.33147(14) 0.0230(4) Uani 1 1 d . . . 
H39 H 0.2482 0.9040 0.3747 0.028 Uiso 1 1 calc R . . 
C40 C 0.3653(2) 0.80783(18) 0.36025(17) 0.0300(5) Uani 1 1 d . . . 
H40 H 0.4043 0.8284 0.4239 0.036 Uiso 1 1 calc R . . 
C41 C 0.4048(2) 0.73292(18) 0.29578(18) 0.0339(5) Uani 1 1 d . . . 
H41 H 0.4715 0.7045 0.3163 0.041 Uiso 1 1 calc R . . 
C42 C 0.3489(2) 0.70096(18) 0.20488(18) 0.0326(5) Uani 1 1 d . . . 
H42 H 0.3784 0.6519 0.1622 0.039 Uiso 1 1 calc R . . 
C43 C 0.2469(2) 0.74003(16) 0.17291(15) 0.0256(4) Uani 1 1 d . . . 
C44 C 0.1776(2) 0.70510(18) 0.08105(16) 0.0325(5) Uani 1 1 d . . . 
H44 H 0.2010 0.6546 0.0355 0.039 Uiso 1 1 calc R . . 
C45 C 0.0781(2) 0.74348(17) 0.05790(15) 0.0303(5) Uani 1 1 d . . . 
H45 H 0.0319 0.7169 -0.0043 0.036 Uiso 1 1 calc R . . 
C46 C -0.1106(2) 0.75193(16) 0.39394(13) 0.0205(4) Uani 1 1 d . . . 
C47 C -0.19696(19) 0.75808(16) 0.45677(14) 0.0224(4) Uani 1 1 d . . . 
H47 H -0.2802 0.7687 0.4402 0.027 Uiso 1 1 calc R . . 
C48 C -0.1598(2) 0.74848(16) 0.54491(14) 0.0239(4) Uani 1 1 d . . . 
H48 H -0.2188 0.7523 0.5886 0.029 Uiso 1 1 calc R . . 
C49 C -0.0381(2) 0.73334(15) 0.57038(14) 0.0231(4) Uani 1 1 d . . . 
C50 C 0.0461(2) 0.72591(16) 0.50480(15) 0.0241(4) Uani 1 1 d . . . 
H50 H 0.1298 0.7158 0.5209 0.029 Uiso 1 1 calc R . . 
C51 C 0.0086(2) 0.73320(16) 0.41644(14) 0.0239(4) Uani 1 1 d . . . 
H51 H 0.0648 0.7253 0.3713 0.029 Uiso 1 1 calc R . . 
C52 C 0.0024(2) 0.72469(19) 0.66612(15) 0.0306(5) Uani 1 1 d . . . 
H52A H 0.0087 0.6522 0.6624 0.046 Uiso 1 1 calc R . . 
H52B H -0.0646 0.7373 0.7043 0.046 Uiso 1 1 calc R . . 
H52C H 0.0897 0.7789 0.6941 0.046 Uiso 1 1 calc R . . 
S3 S 1.11660(5) 0.45406(4) 0.17700(3) 0.02516(11) Uani 1 1 d . . . 
O3 O 1.18000(17) 0.45953(13) 0.27119(11) 0.0353(4) Uani 1 1 d . . . 
N3 N 1.27902(17) 0.39322(15) 0.00111(13) 0.0285(4) Uani 1 1 d . . . 
C53 C 1.05465(19) 0.31276(16) 0.11336(14) 0.0224(4) Uani 1 1 d . . . 
C54 C 1.06929(19) 0.28301(16) 0.02195(14) 0.0204(4) Uani 1 1 d . . . 
C55 C 1.01337(19) 0.17083(16) -0.02867(14) 0.0210(4) Uani 1 1 d . . . 
C56 C 1.0169(2) 0.13470(17) -0.12421(14) 0.0236(4) Uani 1 1 d . . . 
H56 H 1.0617 0.1846 -0.1559 0.028 Uiso 1 1 calc R . . 
C57 C 0.9559(2) 0.02794(17) -0.17165(15) 0.0261(4) Uani 1 1 d . . . 
H57 H 0.9565 0.0050 -0.2362 0.031 Uiso 1 1 calc R . . 
C58 C 0.89256(19) -0.04762(17) -0.12512(15) 0.0256(4) Uani 1 1 d . . . 
H58 H 0.8503 -0.1211 -0.1587 0.031 Uiso 1 1 calc R . . 
C59 C 0.89143(19) -0.01616(16) -0.03228(15) 0.0247(4) Uani 1 1 d . . . 
H59 H 0.8510 -0.0683 -0.0013 0.030 Uiso 1 1 calc R . . 
C60 C 0.95025(19) 0.09396(16) 0.01828(14) 0.0210(4) Uani 1 1 d . . . 
C61 C 0.9460(2) 0.12888(17) 0.11382(15) 0.0241(4) Uani 1 1 d . . . 
H61 H 0.9086 0.0771 0.1461 0.029 Uiso 1 1 calc R . . 
C62 C 0.9952(2) 0.23618(17) 0.16041(14) 0.0239(4) Uani 1 1 d . . . 
H62 H 0.9893 0.2590 0.2241 0.029 Uiso 1 1 calc R . . 
C63 C 1.1478(2) 0.36519(16) -0.02244(14) 0.0219(4) Uani 1 1 d . . . 
C64 C 1.0831(2) 0.41038(15) -0.08280(13) 0.0209(4) Uani 1 1 d . . . 
C65 C 0.9426(2) 0.38214(16) -0.10581(13) 0.0219(4) Uani 1 1 d . . . 
H65 H 0.8867 0.3264 -0.0844 0.026 Uiso 1 1 calc R . . 
C66 C 0.8859(2) 0.43431(17) -0.15868(14) 0.0262(4) Uani 1 1 d . . . 
H66 H 0.7912 0.4149 -0.1736 0.031 Uiso 1 1 calc R . . 
C67 C 0.9686(3) 0.51711(18) -0.19099(14) 0.0319(5) Uani 1 1 d . . . 
H67 H 0.9288 0.5539 -0.2267 0.038 Uiso 1 1 calc R . . 
C68 C 1.1040(3) 0.54481(17) -0.17168(15) 0.0316(5) Uani 1 1 d . . . 
H68 H 1.1581 0.6001 -0.1946 0.038 Uiso 1 1 calc R . . 
C69 C 1.1652(2) 0.49183(16) -0.11760(14) 0.0260(4) Uani 1 1 d . . . 
C70 C 1.3052(2) 0.51876(18) -0.09260(16) 0.0328(5) Uani 1 1 d . . . 
H70 H 1.3639 0.5709 -0.1162 0.039 Uiso 1 1 calc R . . 
C71 C 1.3556(2) 0.46968(18) -0.03457(17) 0.0328(5) Uani 1 1 d . . . 
H71 H 1.4502 0.4901 -0.0179 0.039 Uiso 1 1 calc R . . 
C72 C 0.9537(2) 0.46834(16) 0.18852(14) 0.0241(4) Uani 1 1 d . . . 
C73 C 0.9085(3) 0.47081(18) 0.27173(15) 0.0322(5) Uani 1 1 d . . . 
H73 H 0.9631 0.4663 0.3236 0.039 Uiso 1 1 calc R . . 
C74 C 0.7821(3) 0.48006(19) 0.27882(16) 0.0360(5) Uani 1 1 d . . . 
H74 H 0.7518 0.4833 0.3367 0.043 Uiso 1 1 calc R . . 
C75 C 0.6993(2) 0.48467(16) 0.20428(16) 0.0309(5) Uani 1 1 d . . . 
C76 C 0.7484(2) 0.48458(17) 0.12163(16) 0.0287(5) Uani 1 1 d . . . 
H76 H 0.6937 0.4890 0.0697 0.034 Uiso 1 1 calc R . . 
C77 C 0.8753(2) 0.47821(17) 0.11361(14) 0.0262(4) Uani 1 1 d . . . 
H77 H 0.9086 0.4806 0.0573 0.031 Uiso 1 1 calc R . . 
C78 C 0.5599(3) 0.4911(2) 0.2116(2) 0.0442(6) Uani 1 1 d . . . 
H78A H 0.5570 0.5627 0.2080 0.066 Uiso 1 1 calc R . . 
H78B H 0.5371 0.4795 0.2710 0.066 Uiso 1 1 calc R . . 
H78C H 0.4954 0.4353 0.1607 0.066 Uiso 1 1 calc R . . 
S4 S 0.70960(4) 0.37606(4) 0.59589(3) 0.02113(10) Uani 1 1 d . . . 
O4 O 0.83100(14) 0.46514(12) 0.59222(10) 0.0285(3) Uani 1 1 d . . . 
N4 N 0.52747(16) 0.38336(14) 0.76356(11) 0.0226(4) Uani 1 1 d . . . 
C79 C 0.56932(18) 0.42232(15) 0.57012(13) 0.0192(4) Uani 1 1 d . . . 
C80 C 0.45856(19) 0.39574(15) 0.61133(13) 0.0177(4) Uani 1 1 d . . . 
C81 C 0.34775(18) 0.43158(15) 0.58655(13) 0.0179(4) Uani 1 1 d . . . 
C82 C 0.22922(19) 0.40827(16) 0.62623(14) 0.0211(4) Uani 1 1 d . . . 
H82 H 0.2234 0.3705 0.6729 0.025 Uiso 1 1 calc R . . 
C83 C 0.1241(2) 0.43963(16) 0.59781(14) 0.0226(4) Uani 1 1 d . . . 
H83 H 0.0451 0.4225 0.6243 0.027 Uiso 1 1 calc R . . 
C84 C 0.1306(2) 0.49700(16) 0.52976(14) 0.0225(4) Uani 1 1 d . . . 
H84 H 0.0551 0.5161 0.5092 0.027 Uiso 1 1 calc R . . 
C85 C 0.2450(2) 0.52540(15) 0.49311(14) 0.0214(4) Uani 1 1 d . . . 
H85 H 0.2498 0.5665 0.4489 0.026 Uiso 1 1 calc R . . 
C86 C 0.35641(19) 0.49394(15) 0.52065(13) 0.0182(4) Uani 1 1 d . . . 
C87 C 0.4768(2) 0.52313(15) 0.48416(13) 0.0208(4) Uani 1 1 d . . . 
H87 H 0.4845 0.5670 0.4420 0.025 Uiso 1 1 calc R . . 
C88 C 0.58119(19) 0.48908(16) 0.50882(13) 0.0207(4) Uani 1 1 d . . . 
H88 H 0.6619 0.5101 0.4849 0.025 Uiso 1 1 calc R . . 
C89 C 0.45049(18) 0.33228(15) 0.68203(13) 0.0186(4) Uani 1 1 d . . . 
C90 C 0.35916(19) 0.22484(16) 0.66132(13) 0.0189(4) Uani 1 1 d . . . 
C91 C 0.28456(19) 0.16714(16) 0.57220(14) 0.0225(4) Uani 1 1 d . . . 
H91 H 0.2943 0.1996 0.5222 0.027 Uiso 1 1 calc R . . 
C92 C 0.1981(2) 0.06444(17) 0.55761(15) 0.0251(4) Uani 1 1 d . . . 
H92 H 0.1485 0.0260 0.4975 0.030 Uiso 1 1 calc R . . 
C93 C 0.1826(2) 0.01552(17) 0.63163(16) 0.0286(5) Uani 1 1 d . . . 
H93 H 0.1222 -0.0556 0.6208 0.034 Uiso 1 1 calc R . . 
C94 C 0.2531(2) 0.06894(17) 0.71827(15) 0.0264(4) Uani 1 1 d . . . 
H94 H 0.2408 0.0353 0.7675 0.032 Uiso 1 1 calc R . . 
C95 C 0.3444(2) 0.17422(17) 0.73535(14) 0.0219(4) Uani 1 1 d . . . 
C96 C 0.4251(2) 0.23225(17) 0.82241(14) 0.0250(4) Uani 1 1 d . . . 
H96 H 0.4169 0.2022 0.8739 0.030 Uiso 1 1 calc R . . 
C97 C 0.5150(2) 0.33154(18) 0.83200(14) 0.0254(4) Uani 1 1 d . . . 
H97 H 0.5725 0.3668 0.8900 0.031 Uiso 1 1 calc R . . 
C98 C 0.67827(19) 0.27211(16) 0.48926(14) 0.0209(4) Uani 1 1 d . . . 
C99 C 0.5945(2) 0.16927(17) 0.48157(15) 0.0263(4) Uani 1 1 d . . . 
H99 H 0.5537 0.1531 0.5325 0.032 Uiso 1 1 calc R . . 
C100 C 0.5704(2) 0.08995(18) 0.39917(15) 0.0283(5) Uani 1 1 d . . . 
H100 H 0.5128 0.0192 0.3941 0.034 Uiso 1 1 calc R . . 
C101 C 0.6291(2) 0.11180(17) 0.32324(15) 0.0256(4) Uani 1 1 d . . . 
C102 C 0.7148(2) 0.21577(18) 0.33348(15) 0.0273(4) Uani 1 1 d . . . 
H102 H 0.7561 0.2324 0.2828 0.033 Uiso 1 1 calc R . . 
C103 C 0.7411(2) 0.29562(17) 0.41634(15) 0.0249(4) Uani 1 1 d . . . 
H103 H 0.8016 0.3657 0.4229 0.030 Uiso 1 1 calc R . . 
C104 C 0.6000(2) 0.0253(2) 0.23368(16) 0.0351(5) Uani 1 1 d . . . 
H10A H 0.5601 0.0485 0.1837 0.053 Uiso 1 1 calc R . . 
H10B H 0.5374 -0.0418 0.2397 0.053 Uiso 1 1 calc R . . 
H10C H 0.6836 0.0126 0.2192 0.053 Uiso 1 1 calc R . . 
  
loop_ 
 _atom_site_aniso_label 
 _atom_site_aniso_U_11 
 _atom_site_aniso_U_22 
 _atom_site_aniso_U_33 
 _atom_site_aniso_U_23 
 _atom_site_aniso_U_13 
 _atom_site_aniso_U_12 
S1 0.0182(2) 0.0206(2) 0.0194(2) 0.00465(18) 0.00116(18) 0.00502(18) 
O1 0.0271(8) 0.0279(8) 0.0204(7) 0.0029(6) -0.0024(6) 0.0008(6) 
N1 0.0199(8) 0.0192(8) 0.0245(9) 0.0053(7) 0.0040(7) 0.0044(7) 
C1 0.0175(9) 0.0154(9) 0.0205(10) 0.0055(7) -0.0009(7) 0.0026(7) 
C2 0.0154(9) 0.0129(9) 0.0231(10) 0.0013(7) 0.0016(7) 0.0019(7) 
C3 0.0157(9) 0.0142(9) 0.0240(10) 0.0052(7) 0.0027(7) 0.0001(7) 
C4 0.0213(9) 0.0196(10) 0.0246(10) 0.0051(8) 0.0032(8) 0.0057(8) 
C5 0.0290(11) 0.0251(11) 0.0241(11) 0.0086(9) 0.0036(9) 0.0045(8) 
C6 0.0289(11) 0.0219(11) 0.0362(12) 0.0134(9) -0.0046(9) 0.0068(9) 
C7 0.0233(10) 0.0188(10) 0.0383(12) 0.0073(9) 0.0031(9) 0.0079(8) 
C8 0.0172(9) 0.0144(9) 0.0287(11) 0.0050(8) 0.0028(8) 0.0018(7) 
C9 0.0196(9) 0.0153(9) 0.0327(11) 0.0004(8) 0.0048(8) 0.0046(7) 
C10 0.0216(10) 0.0183(10) 0.0204(10) 0.0004(8) 0.0037(8) 0.0035(7) 
C11 0.0190(9) 0.0195(10) 0.0167(9) 0.0073(8) 0.0037(7) 0.0072(8) 
C12 0.0190(9) 0.0170(9) 0.0166(9) 0.0048(7) 0.0021(7) 0.0069(7) 
C13 0.0210(10) 0.0205(10) 0.0206(10) 0.0044(8) 0.0023(8) 0.0070(8) 
C14 0.0237(10) 0.0215(10) 0.0273(11) 0.0061(8) -0.0005(8) 0.0030(8) 
C15 0.0371(12) 0.0181(10) 0.0223(10) -0.0001(8) 0.0009(9) 0.0089(9) 
C16 0.0334(11) 0.0227(11) 0.0204(10) 0.0048(8) 0.0067(8) 0.0146(9) 
C17 0.0245(10) 0.0228(10) 0.0158(9) 0.0069(8) 0.0041(8) 0.0115(8) 
C18 0.0213(10) 0.0294(11) 0.0228(10) 0.0092(8) 0.0081(8) 0.0129(8) 
C19 0.0170(9) 0.0277(11) 0.0253(10) 0.0103(8) 0.0059(8) 0.0072(8) 
C20 0.0181(9) 0.0190(10) 0.0203(10) 0.0069(8) 0.0001(7) 0.0033(7) 
C21 0.0247(10) 0.0220(10) 0.0213(10) 0.0036(8) 0.0040(8) 0.0109(8) 
C22 0.0285(10) 0.0188(10) 0.0199(10) 0.0032(8) 0.0019(8) 0.0068(8) 
C23 0.0229(10) 0.0238(11) 0.0249(10) 0.0096(8) 0.0029(8) 0.0069(8) 
C24 0.0286(11) 0.0259(11) 0.0230(10) 0.0062(8) 0.0087(8) 0.0105(9) 
C25 0.0298(11) 0.0191(10) 0.0198(10) 0.0023(8) 0.0047(8) 0.0075(8) 
C26 0.0304(12) 0.0234(11) 0.0354(12) 0.0091(9) 0.0096(9) 0.0046(9) 
S2 0.0208(2) 0.0255(3) 0.0181(2) 0.00531(19) 0.00287(18) 0.00224(19) 
O2 0.0201(7) 0.0458(10) 0.0274(8) 0.0147(7) -0.0009(6) 0.0030(7) 
N2 0.0281(9) 0.0225(9) 0.0208(9) 0.0048(7) 0.0050(7) 0.0026(7) 
C27 0.0205(9) 0.0232(10) 0.0180(9) 0.0060(8) -0.0012(7) 0.0077(8) 
C28 0.0197(9) 0.0210(10) 0.0148(9) 0.0040(7) 0.0007(7) 0.0074(8) 
C29 0.0222(9) 0.0215(10) 0.0182(9) 0.0050(8) -0.0004(7) 0.0093(8) 
C30 0.0266(10) 0.0192(10) 0.0239(10) 0.0033(8) 0.0023(8) 0.0072(8) 
C31 0.0282(11) 0.0248(11) 0.0265(11) 0.0095(9) 0.0032(9) 0.0037(9) 
C32 0.0406(13) 0.0181(10) 0.0244(11) 0.0036(8) -0.0049(9) 0.0047(9) 
C33 0.0425(13) 0.0211(11) 0.0190(10) 0.0018(8) 0.0001(9) 0.0152(9) 
C34 0.0294(10) 0.0237(10) 0.0162(9) 0.0037(8) -0.0005(8) 0.0135(8) 
C35 0.0351(11) 0.0306(12) 0.0199(10) 0.0049(8) 0.0050(8) 0.0214(9) 
C36 0.0233(10) 0.0348(12) 0.0215(10) 0.0102(9) 0.0058(8) 0.0139(9) 
C37 0.0213(9) 0.0142(9) 0.0200(10) 0.0039(7) 0.0060(8) -0.0001(7) 
C38 0.0174(9) 0.0130(9) 0.0268(10) 0.0043(8) 0.0087(8) 0.0019(7) 
C39 0.0206(10) 0.0187(10) 0.0277(11) 0.0038(8) 0.0058(8) 0.0045(8) 
C40 0.0216(10) 0.0272(11) 0.0392(13) 0.0108(10) 0.0028(9) 0.0040(8) 
C41 0.0208(10) 0.0251(11) 0.0601(16) 0.0152(11) 0.0090(10) 0.0101(9) 
C42 0.0277(11) 0.0223(11) 0.0498(14) 0.0072(10) 0.0196(10) 0.0089(9) 
C43 0.0266(10) 0.0162(10) 0.0320(11) 0.0042(8) 0.0150(9) 0.0020(8) 
C44 0.0405(13) 0.0231(11) 0.0304(12) 0.0003(9) 0.0192(10) 0.0056(10) 
C45 0.0409(13) 0.0224(11) 0.0188(10) 0.0009(8) 0.0068(9) -0.0004(9) 
C46 0.0241(10) 0.0179(10) 0.0168(9) 0.0042(7) 0.0028(8) 0.0028(8) 
C47 0.0180(9) 0.0232(10) 0.0253(10) 0.0056(8) 0.0034(8) 0.0060(8) 
C48 0.0276(10) 0.0208(10) 0.0236(10) 0.0065(8) 0.0075(8) 0.0064(8) 
C49 0.0274(10) 0.0124(9) 0.0246(10) 0.0054(8) 0.0004(8) -0.0002(7) 
C50 0.0192(9) 0.0177(10) 0.0328(11) 0.0070(8) -0.0015(8) 0.0036(7) 
C51 0.0215(10) 0.0221(10) 0.0280(11) 0.0070(8) 0.0076(8) 0.0052(8) 
C52 0.0366(12) 0.0265(11) 0.0255(11) 0.0093(9) -0.0027(9) 0.0058(9) 
S3 0.0295(3) 0.0188(2) 0.0225(3) 0.00239(19) 0.0003(2) 0.0042(2) 
O3 0.0425(9) 0.0285(9) 0.0267(8) 0.0008(7) -0.0070(7) 0.0078(7) 
N3 0.0221(9) 0.0243(9) 0.0342(10) 0.0014(8) 0.0069(7) 0.0041(7) 
C53 0.0212(10) 0.0175(10) 0.0260(11) 0.0042(8) -0.0015(8) 0.0051(8) 
C54 0.0174(9) 0.0208(10) 0.0236(10) 0.0059(8) 0.0007(8) 0.0080(8) 
C55 0.0174(9) 0.0207(10) 0.0261(10) 0.0068(8) 0.0008(8) 0.0081(7) 
C56 0.0216(10) 0.0221(10) 0.0272(11) 0.0062(8) 0.0041(8) 0.0074(8) 
C57 0.0234(10) 0.0247(11) 0.0273(11) 0.0012(9) 0.0002(8) 0.0088(8) 
C58 0.0161(9) 0.0182(10) 0.0368(12) -0.0008(9) 0.0027(8) 0.0037(8) 
C59 0.0157(9) 0.0195(10) 0.0387(12) 0.0084(9) 0.0053(8) 0.0044(7) 
C60 0.0145(9) 0.0204(10) 0.0295(11) 0.0066(8) 0.0023(8) 0.0079(7) 
C61 0.0206(10) 0.0235(11) 0.0309(11) 0.0115(9) 0.0042(8) 0.0075(8) 
C62 0.0250(10) 0.0262(11) 0.0203(10) 0.0054(8) 0.0023(8) 0.0086(8) 
C63 0.0218(10) 0.0163(9) 0.0229(10) -0.0007(8) 0.0049(8) 0.0032(7) 
C64 0.0259(10) 0.0148(9) 0.0180(9) -0.0002(7) 0.0066(8) 0.0032(8) 
C65 0.0248(10) 0.0154(9) 0.0213(10) 0.0038(8) 0.0050(8) 0.0005(7) 
C66 0.0331(11) 0.0218(10) 0.0207(10) 0.0031(8) 0.0011(8) 0.0070(9) 
C67 0.0517(15) 0.0218(11) 0.0204(11) 0.0062(9) 0.0021(10) 0.0095(10) 
C68 0.0491(14) 0.0177(10) 0.0226(11) 0.0034(8) 0.0127(10) 0.0016(9) 
C69 0.0339(11) 0.0171(10) 0.0199(10) -0.0028(8) 0.0110(8) 0.0011(8) 
C70 0.0322(12) 0.0213(11) 0.0364(13) -0.0014(9) 0.0207(10) -0.0021(9) 
C71 0.0198(10) 0.0266(12) 0.0428(13) -0.0032(10) 0.0102(10) 0.0013(9) 
C72 0.0323(11) 0.0132(9) 0.0243(10) 0.0025(8) 0.0056(8) 0.0052(8) 
C73 0.0507(14) 0.0241(11) 0.0246(11) 0.0085(9) 0.0090(10) 0.0136(10) 
C74 0.0578(15) 0.0273(12) 0.0316(12) 0.0109(10) 0.0246(11) 0.0188(11) 
C75 0.0407(13) 0.0131(10) 0.0400(13) 0.0051(9) 0.0158(10) 0.0087(9) 
C76 0.0351(12) 0.0166(10) 0.0308(11) 0.0027(8) 0.0026(9) 0.0063(9) 
C77 0.0357(12) 0.0216(10) 0.0210(10) 0.0047(8) 0.0083(9) 0.0081(9) 
C78 0.0465(15) 0.0307(13) 0.0611(18) 0.0112(12) 0.0277(13) 0.0159(11) 
S4 0.0172(2) 0.0238(2) 0.0221(2) 0.00478(19) 0.00371(18) 0.00696(18) 
O4 0.0171(7) 0.0283(8) 0.0337(8) 0.0020(6) 0.0030(6) 0.0027(6) 
N4 0.0228(8) 0.0254(9) 0.0199(8) 0.0049(7) 0.0050(7) 0.0083(7) 
C79 0.0170(9) 0.0175(9) 0.0211(10) 0.0018(8) 0.0008(7) 0.0055(7) 
C80 0.0200(9) 0.0137(9) 0.0158(9) 0.0003(7) 0.0030(7) 0.0029(7) 
C81 0.0182(9) 0.0133(9) 0.0179(9) -0.0006(7) 0.0016(7) 0.0024(7) 
C82 0.0236(10) 0.0188(10) 0.0217(10) 0.0063(8) 0.0055(8) 0.0064(8) 
C83 0.0190(9) 0.0173(10) 0.0288(11) 0.0033(8) 0.0076(8) 0.0029(7) 
C84 0.0215(10) 0.0170(10) 0.0277(11) 0.0026(8) 0.0015(8) 0.0074(8) 
C85 0.0273(10) 0.0140(9) 0.0214(10) 0.0030(7) 0.0014(8) 0.0065(8) 
C86 0.0215(9) 0.0113(9) 0.0175(9) -0.0010(7) 0.0020(7) 0.0027(7) 
C87 0.0279(10) 0.0139(9) 0.0191(10) 0.0042(7) 0.0056(8) 0.0036(8) 
C88 0.0227(10) 0.0179(10) 0.0197(9) 0.0034(8) 0.0081(8) 0.0038(8) 
C89 0.0171(9) 0.0202(10) 0.0204(9) 0.0063(8) 0.0039(7) 0.0079(7) 
C90 0.0180(9) 0.0200(10) 0.0221(10) 0.0068(8) 0.0064(7) 0.0093(7) 
C91 0.0225(10) 0.0217(10) 0.0256(10) 0.0087(8) 0.0045(8) 0.0085(8) 
C92 0.0223(10) 0.0206(10) 0.0300(11) 0.0040(8) 0.0016(8) 0.0058(8) 
C93 0.0286(11) 0.0185(10) 0.0408(13) 0.0114(9) 0.0105(9) 0.0063(8) 
C94 0.0297(11) 0.0229(11) 0.0355(12) 0.0159(9) 0.0148(9) 0.0126(9) 
C95 0.0220(10) 0.0246(10) 0.0258(10) 0.0113(8) 0.0091(8) 0.0124(8) 
C96 0.0308(11) 0.0308(11) 0.0212(10) 0.0115(9) 0.0103(8) 0.0163(9) 
C97 0.0291(11) 0.0300(11) 0.0180(10) 0.0045(8) 0.0028(8) 0.0125(9) 
C98 0.0180(9) 0.0224(10) 0.0246(10) 0.0061(8) 0.0037(8) 0.0099(8) 
C99 0.0242(10) 0.0256(11) 0.0291(11) 0.0098(9) 0.0067(9) 0.0050(8) 
C100 0.0245(10) 0.0219(11) 0.0351(12) 0.0064(9) 0.0028(9) 0.0037(8) 
C101 0.0245(10) 0.0263(11) 0.0291(11) 0.0054(9) 0.0031(8) 0.0148(9) 
C102 0.0283(11) 0.0295(12) 0.0280(11) 0.0102(9) 0.0100(9) 0.0114(9) 
C103 0.0250(10) 0.0206(10) 0.0309(11) 0.0073(8) 0.0097(8) 0.0081(8) 
C104 0.0362(13) 0.0310(13) 0.0345(13) 0.0009(10) 0.0017(10) 0.0124(10) 
  
_geom_special_details 
; 
 All esds (except the esd in the dihedral angle between two l.s. planes) 
 are estimated using the full covariance matrix.  The cell esds are taken 
 into account individually in the estimation of esds in distances, angles 
 and torsion angles; correlations between esds in cell parameters are only 
 used when they are defined by crystal symmetry.  An approximate (isotropic) 
 treatment of cell esds is used for estimating esds involving l.s. planes. 
; 
  
loop_ 
 _geom_bond_atom_site_label_1 
 _geom_bond_atom_site_label_2 
 _geom_bond_distance 
 _geom_bond_site_symmetry_2 
 _geom_bond_publ_flag 
S1 O1 1.4934(15) . ? 
S1 C20 1.801(2) . ? 
S1 C1 1.8101(19) . ? 
N1 C11 1.320(2) . ? 
N1 C19 1.364(3) . ? 
C1 C2 1.368(3) . ? 
C1 C10 1.416(3) . ? 
C2 C3 1.433(3) . ? 
C2 C11 1.497(3) . ? 
C3 C4 1.420(3) . ? 
C3 C8 1.425(3) . ? 
C4 C5 1.363(3) . ? 
C4 H4 0.9500 . ? 
C5 C6 1.410(3) . ? 
C5 H5 0.9500 . ? 
C6 C7 1.362(3) . ? 
C6 H6 0.9500 . ? 
C7 C8 1.421(3) . ? 
C7 H7 0.9500 . ? 
C8 C9 1.416(3) . ? 
C9 C10 1.358(3) . ? 
C9 H9 0.9500 . ? 
C10 H10 0.9500 . ? 
C11 C12 1.429(3) . ? 
C12 C13 1.422(3) . ? 
C12 C17 1.427(3) . ? 
C13 C14 1.367(3) . ? 
C13 H13 0.9500 . ? 
C14 C15 1.417(3) . ? 
C14 H14 0.9500 . ? 
C15 C16 1.362(3) . ? 
C15 H15 0.9500 . ? 
C16 C17 1.416(3) . ? 
C16 H16 0.9500 . ? 
C17 C18 1.411(3) . ? 
C18 C19 1.358(3) . ? 
C18 H18 0.9500 . ? 
C19 H19 0.9500 . ? 
C20 C21 1.381(3) . ? 
C20 C25 1.387(3) . ? 
C21 C22 1.391(3) . ? 
C21 H21 0.9500 . ? 
C22 C23 1.389(3) . ? 
C22 H22 0.9500 . ? 
C23 C24 1.395(3) . ? 
C23 C26 1.506(3) . ? 
C24 C25 1.387(3) . ? 
C24 H24 0.9500 . ? 
C25 H25 0.9500 . ? 
C26 H26A 0.9800 . ? 
C26 H26B 0.9800 . ? 
C26 H26C 0.9800 . ? 
S2 O2 1.4920(16) . ? 
S2 C46 1.798(2) . ? 
S2 C27 1.808(2) . ? 
N2 C37 1.317(3) . ? 
N2 C45 1.366(3) . ? 
C27 C28 1.372(3) . ? 
C27 C36 1.412(3) . ? 
C28 C29 1.433(3) . ? 
C28 C37 1.504(3) . ? 
C29 C30 1.415(3) . ? 
C29 C34 1.426(3) . ? 
C30 C31 1.373(3) . ? 
C30 H30 0.9500 . ? 
C31 C32 1.413(3) . ? 
C31 H31 0.9500 . ? 
C32 C33 1.360(3) . ? 
C32 H32 0.9500 . ? 
C33 C34 1.415(3) . ? 
C33 H33 0.9500 . ? 
C34 C35 1.419(3) . ? 
C35 C36 1.362(3) . ? 
C35 H35 0.9500 . ? 
C36 H36 0.9500 . ? 
C37 C38 1.420(3) . ? 
C38 C39 1.418(3) . ? 
C38 C43 1.425(3) . ? 
C39 C40 1.367(3) . ? 
C39 H39 0.9500 . ? 
C40 C41 1.410(3) . ? 
C40 H40 0.9500 . ? 
C41 C42 1.355(4) . ? 
C41 H41 0.9500 . ? 
C42 C43 1.416(3) . ? 
C42 H42 0.9500 . ? 
C43 C44 1.408(3) . ? 
C44 C45 1.345(3) . ? 
C44 H44 0.9500 . ? 
C45 H45 0.9500 . ? 
C46 C47 1.378(3) . ? 
C46 C51 1.379(3) . ? 
C47 C48 1.390(3) . ? 
C47 H47 0.9500 . ? 
C48 C49 1.390(3) . ? 
C48 H48 0.9500 . ? 
C49 C50 1.394(3) . ? 
C49 C52 1.502(3) . ? 
C50 C51 1.383(3) . ? 
C50 H50 0.9500 . ? 
C51 H51 0.9500 . ? 
C52 H52A 0.9800 . ? 
C52 H52B 0.9800 . ? 
C52 H52C 0.9800 . ? 
S3 O3 1.4848(16) . ? 
S3 C72 1.805(2) . ? 
S3 C53 1.808(2) . ? 
N3 C63 1.319(3) . ? 
N3 C71 1.359(3) . ? 
C53 C54 1.376(3) . ? 
C53 C62 1.411(3) . ? 
C54 C55 1.439(3) . ? 
C54 C63 1.503(3) . ? 
C55 C56 1.414(3) . ? 
C55 C60 1.424(3) . ? 
C56 C57 1.374(3) . ? 
C56 H56 0.9500 . ? 
C57 C58 1.408(3) . ? 
C57 H57 0.9500 . ? 
C58 C59 1.364(3) . ? 
C58 H58 0.9500 . ? 
C59 C60 1.419(3) . ? 
C59 H59 0.9500 . ? 
C60 C61 1.414(3) . ? 
C61 C62 1.367(3) . ? 
C61 H61 0.9500 . ? 
C62 H62 0.9500 . ? 
C63 C64 1.423(3) . ? 
C64 C65 1.412(3) . ? 
C64 C69 1.421(3) . ? 
C65 C66 1.370(3) . ? 
C65 H65 0.9500 . ? 
C66 C67 1.414(3) . ? 
C66 H66 0.9500 . ? 
C67 C68 1.356(3) . ? 
C67 H67 0.9500 . ? 
C68 C69 1.416(3) . ? 
C68 H68 0.9500 . ? 
C69 C70 1.411(3) . ? 
C70 C71 1.359(4) . ? 
C70 H70 0.9500 . ? 
C71 H71 0.9500 . ? 
C72 C73 1.376(3) . ? 
C72 C77 1.388(3) . ? 
C73 C74 1.387(4) . ? 
C73 H73 0.9500 . ? 
C74 C75 1.380(4) . ? 
C74 H74 0.9500 . ? 
C75 C76 1.390(3) . ? 
C75 C78 1.512(3) . ? 
C76 C77 1.383(3) . ? 
C76 H76 0.9500 . ? 
C77 H77 0.9500 . ? 
C78 H78A 0.9800 . ? 
C78 H78B 0.9800 . ? 
C78 H78C 0.9800 . ? 
S4 O4 1.4969(15) . ? 
S4 C98 1.798(2) . ? 
S4 C79 1.8040(19) . ? 
N4 C89 1.321(3) . ? 
N4 C97 1.361(3) . ? 
C79 C80 1.371(3) . ? 
C79 C88 1.412(3) . ? 
C80 C81 1.435(3) . ? 
C80 C89 1.497(3) . ? 
C81 C82 1.422(3) . ? 
C81 C86 1.426(3) . ? 
C82 C83 1.360(3) . ? 
C82 H82 0.9500 . ? 
C83 C84 1.407(3) . ? 
C83 H83 0.9500 . ? 
C84 C85 1.366(3) . ? 
C84 H84 0.9500 . ? 
C85 C86 1.416(3) . ? 
C85 H85 0.9500 . ? 
C86 C87 1.420(3) . ? 
C87 C88 1.359(3) . ? 
C87 H87 0.9500 . ? 
C88 H88 0.9500 . ? 
C89 C90 1.430(3) . ? 
C90 C91 1.412(3) . ? 
C90 C95 1.426(3) . ? 
C91 C92 1.371(3) . ? 
C91 H91 0.9500 . ? 
C92 C93 1.413(3) . ? 
C92 H92 0.9500 . ? 
C93 C94 1.361(3) . ? 
C93 H93 0.9500 . ? 
C94 C95 1.412(3) . ? 
C94 H94 0.9500 . ? 
C95 C96 1.412(3) . ? 
C96 C97 1.362(3) . ? 
C96 H96 0.9500 . ? 
C97 H97 0.9500 . ? 
C98 C99 1.380(3) . ? 
C98 C103 1.383(3) . ? 
C99 C100 1.383(3) . ? 
C99 H99 0.9500 . ? 
C100 C101 1.397(3) . ? 
C100 H100 0.9500 . ? 
C101 C102 1.392(3) . ? 
C101 C104 1.502(3) . ? 
C102 C103 1.389(3) . ? 
C102 H102 0.9500 . ? 
C103 H103 0.9500 . ? 
C104 H10A 0.9800 . ? 
C104 H10B 0.9800 . ? 
C104 H10C 0.9800 . ? 
  
loop_ 
 _geom_angle_atom_site_label_1 
 _geom_angle_atom_site_label_2 
 _geom_angle_atom_site_label_3 
 _geom_angle 
 _geom_angle_site_symmetry_1 
 _geom_angle_site_symmetry_3 
 _geom_angle_publ_flag 
O1 S1 C20 105.50(9) . . ? 
O1 S1 C1 106.33(9) . . ? 
C20 S1 C1 96.66(9) . . ? 
C11 N1 C19 117.67(18) . . ? 
C2 C1 C10 122.52(17) . . ? 
C2 C1 S1 120.34(15) . . ? 
C10 C1 S1 117.13(14) . . ? 
C1 C2 C3 118.37(17) . . ? 
C1 C2 C11 122.57(17) . . ? 
C3 C2 C11 118.80(17) . . ? 
C4 C3 C8 118.42(18) . . ? 
C4 C3 C2 122.27(18) . . ? 
C8 C3 C2 119.31(18) . . ? 
C5 C4 C3 121.21(19) . . ? 
C5 C4 H4 119.4 . . ? 
C3 C4 H4 119.4 . . ? 
C4 C5 C6 120.2(2) . . ? 
C4 C5 H5 119.9 . . ? 
C6 C5 H5 119.9 . . ? 
C7 C6 C5 120.23(19) . . ? 
C7 C6 H6 119.9 . . ? 
C5 C6 H6 119.9 . . ? 
C6 C7 C8 121.1(2) . . ? 
C6 C7 H7 119.4 . . ? 
C8 C7 H7 119.4 . . ? 
C9 C8 C7 122.02(19) . . ? 
C9 C8 C3 119.34(18) . . ? 
C7 C8 C3 118.65(19) . . ? 
C10 C9 C8 120.85(18) . . ? 
C10 C9 H9 119.6 . . ? 
C8 C9 H9 119.6 . . ? 
C9 C10 C1 119.47(18) . . ? 
C9 C10 H10 120.3 . . ? 
C1 C10 H10 120.3 . . ? 
N1 C11 C12 123.40(17) . . ? 
N1 C11 C2 114.48(17) . . ? 
C12 C11 C2 122.00(17) . . ? 
C13 C12 C17 119.13(18) . . ? 
C13 C12 C11 123.36(17) . . ? 
C17 C12 C11 117.50(17) . . ? 
C14 C13 C12 120.21(18) . . ? 
C14 C13 H13 119.9 . . ? 
C12 C13 H13 119.9 . . ? 
C13 C14 C15 120.3(2) . . ? 
C13 C14 H14 119.8 . . ? 
C15 C14 H14 119.8 . . ? 
C16 C15 C14 120.9(2) . . ? 
C16 C15 H15 119.5 . . ? 
C14 C15 H15 119.5 . . ? 
C15 C16 C17 120.30(19) . . ? 
C15 C16 H16 119.9 . . ? 
C17 C16 H16 119.9 . . ? 
C18 C17 C16 123.24(18) . . ? 
C18 C17 C12 117.66(18) . . ? 
C16 C17 C12 119.10(18) . . ? 
C19 C18 C17 119.39(18) . . ? 
C19 C18 H18 120.3 . . ? 
C17 C18 H18 120.3 . . ? 
C18 C19 N1 124.26(18) . . ? 
C18 C19 H19 117.9 . . ? 
N1 C19 H19 117.9 . . ? 
C21 C20 C25 120.95(18) . . ? 
C21 C20 S1 119.55(15) . . ? 
C25 C20 S1 119.49(15) . . ? 
C20 C21 C22 119.27(18) . . ? 
C20 C21 H21 120.4 . . ? 
C22 C21 H21 120.4 . . ? 
C23 C22 C21 121.00(19) . . ? 
C23 C22 H22 119.5 . . ? 
C21 C22 H22 119.5 . . ? 
C22 C23 C24 118.55(19) . . ? 
C22 C23 C26 121.35(19) . . ? 
C24 C23 C26 120.10(19) . . ? 
C25 C24 C23 121.08(19) . . ? 
C25 C24 H24 119.5 . . ? 
C23 C24 H24 119.5 . . ? 
C24 C25 C20 119.13(19) . . ? 
C24 C25 H25 120.4 . . ? 
C20 C25 H25 120.4 . . ? 
C23 C26 H26A 109.5 . . ? 
C23 C26 H26B 109.5 . . ? 
H26A C26 H26B 109.5 . . ? 
C23 C26 H26C 109.5 . . ? 
H26A C26 H26C 109.5 . . ? 
H26B C26 H26C 109.5 . . ? 
O2 S2 C46 105.76(9) . . ? 
O2 S2 C27 105.61(9) . . ? 
C46 S2 C27 96.87(9) . . ? 
C37 N2 C45 116.57(19) . . ? 
C28 C27 C36 122.16(19) . . ? 
C28 C27 S2 120.00(15) . . ? 
C36 C27 S2 117.83(15) . . ? 
C27 C28 C29 118.94(18) . . ? 
C27 C28 C37 121.69(17) . . ? 
C29 C28 C37 119.33(17) . . ? 
C30 C29 C34 118.70(18) . . ? 
C30 C29 C28 122.25(18) . . ? 
C34 C29 C28 119.04(18) . . ? 
C31 C30 C29 120.7(2) . . ? 
C31 C30 H30 119.6 . . ? 
C29 C30 H30 119.6 . . ? 
C30 C31 C32 120.3(2) . . ? 
C30 C31 H31 119.8 . . ? 
C32 C31 H31 119.8 . . ? 
C33 C32 C31 120.3(2) . . ? 
C33 C32 H32 119.9 . . ? 
C31 C32 H32 119.9 . . ? 
C32 C33 C34 121.03(19) . . ? 
C32 C33 H33 119.5 . . ? 
C34 C33 H33 119.5 . . ? 
C33 C34 C35 121.74(19) . . ? 
C33 C34 C29 118.99(19) . . ? 
C35 C34 C29 119.26(19) . . ? 
C36 C35 C34 120.96(19) . . ? 
C36 C35 H35 119.5 . . ? 
C34 C35 H35 119.5 . . ? 
C35 C36 C27 119.58(19) . . ? 
C35 C36 H36 120.2 . . ? 
C27 C36 H36 120.2 . . ? 
N2 C37 C38 124.31(18) . . ? 
N2 C37 C28 115.07(18) . . ? 
C38 C37 C28 120.62(17) . . ? 
C39 C38 C37 123.56(17) . . ? 
C39 C38 C43 118.99(18) . . ? 
C37 C38 C43 117.42(18) . . ? 
C40 C39 C38 120.35(19) . . ? 
C40 C39 H39 119.8 . . ? 
C38 C39 H39 119.8 . . ? 
C39 C40 C41 120.3(2) . . ? 
C39 C40 H40 119.9 . . ? 
C41 C40 H40 119.9 . . ? 
C42 C41 C40 120.9(2) . . ? 
C42 C41 H41 119.6 . . ? 
C40 C41 H41 119.6 . . ? 
C41 C42 C43 120.6(2) . . ? 
C41 C42 H42 119.7 . . ? 
C43 C42 H42 119.7 . . ? 
C44 C43 C42 124.0(2) . . ? 
C44 C43 C38 117.2(2) . . ? 
C42 C43 C38 118.8(2) . . ? 
C45 C44 C43 119.84(19) . . ? 
C45 C44 H44 120.1 . . ? 
C43 C44 H44 120.1 . . ? 
C44 C45 N2 124.7(2) . . ? 
C44 C45 H45 117.7 . . ? 
N2 C45 H45 117.7 . . ? 
C47 C46 C51 121.06(18) . . ? 
C47 C46 S2 119.62(16) . . ? 
C51 C46 S2 119.32(15) . . ? 
C46 C47 C48 118.67(18) . . ? 
C46 C47 H47 120.7 . . ? 
C48 C47 H47 120.7 . . ? 
C47 C48 C49 121.38(19) . . ? 
C47 C48 H48 119.3 . . ? 
C49 C48 H48 119.3 . . ? 
C48 C49 C50 118.53(18) . . ? 
C48 C49 C52 121.16(19) . . ? 
C50 C49 C52 120.32(19) . . ? 
C51 C50 C49 120.40(19) . . ? 
C51 C50 H50 119.8 . . ? 
C49 C50 H50 119.8 . . ? 
C46 C51 C50 119.89(19) . . ? 
C46 C51 H51 120.1 . . ? 
C50 C51 H51 120.1 . . ? 
C49 C52 H52A 109.5 . . ? 
C49 C52 H52B 109.5 . . ? 
H52A C52 H52B 109.5 . . ? 
C49 C52 H52C 109.5 . . ? 
H52A C52 H52C 109.5 . . ? 
H52B C52 H52C 109.5 . . ? 
O3 S3 C72 106.08(10) . . ? 
O3 S3 C53 106.98(9) . . ? 
C72 S3 C53 95.59(9) . . ? 
C63 N3 C71 117.6(2) . . ? 
C54 C53 C62 122.17(18) . . ? 
C54 C53 S3 119.49(15) . . ? 
C62 C53 S3 118.33(16) . . ? 
C53 C54 C55 118.54(18) . . ? 
C53 C54 C63 120.56(17) . . ? 
C55 C54 C63 120.83(17) . . ? 
C56 C55 C60 118.85(18) . . ? 
C56 C55 C54 122.02(18) . . ? 
C60 C55 C54 119.12(18) . . ? 
C57 C56 C55 120.5(2) . . ? 
C57 C56 H56 119.7 . . ? 
C55 C56 H56 119.7 . . ? 
C56 C57 C58 120.4(2) . . ? 
C56 C57 H57 119.8 . . ? 
C58 C57 H57 119.8 . . ? 
C59 C58 C57 120.55(19) . . ? 
C59 C58 H58 119.7 . . ? 
C57 C58 H58 119.7 . . ? 
C58 C59 C60 120.47(19) . . ? 
C58 C59 H59 119.8 . . ? 
C60 C59 H59 119.8 . . ? 
C61 C60 C59 121.37(19) . . ? 
C61 C60 C55 119.49(18) . . ? 
C59 C60 C55 119.14(19) . . ? 
C62 C61 C60 120.84(19) . . ? 
C62 C61 H61 119.6 . . ? 
C60 C61 H61 119.6 . . ? 
C61 C62 C53 119.65(19) . . ? 
C61 C62 H62 120.2 . . ? 
C53 C62 H62 120.2 . . ? 
N3 C63 C64 123.62(19) . . ? 
N3 C63 C54 114.80(18) . . ? 
C64 C63 C54 121.56(17) . . ? 
C65 C64 C69 118.89(19) . . ? 
C65 C64 C63 123.36(18) . . ? 
C69 C64 C63 117.68(19) . . ? 
C66 C65 C64 120.72(19) . . ? 
C66 C65 H65 119.6 . . ? 
C64 C65 H65 119.6 . . ? 
C65 C66 C67 119.9(2) . . ? 
C65 C66 H66 120.1 . . ? 
C67 C66 H66 120.1 . . ? 
C68 C67 C66 120.9(2) . . ? 
C68 C67 H67 119.5 . . ? 
C66 C67 H67 119.5 . . ? 
C67 C68 C69 120.4(2) . . ? 
C67 C68 H68 119.8 . . ? 
C69 C68 H68 119.8 . . ? 
C70 C69 C68 123.3(2) . . ? 
C70 C69 C64 117.4(2) . . ? 
C68 C69 C64 119.2(2) . . ? 
C71 C70 C69 119.6(2) . . ? 
C71 C70 H70 120.2 . . ? 
C69 C70 H70 120.2 . . ? 
N3 C71 C70 124.0(2) . . ? 
N3 C71 H71 118.0 . . ? 
C70 C71 H71 118.0 . . ? 
C73 C72 C77 120.3(2) . . ? 
C73 C72 S3 119.95(17) . . ? 
C77 C72 S3 119.71(16) . . ? 
C72 C73 C74 119.1(2) . . ? 
C72 C73 H73 120.4 . . ? 
C74 C73 H73 120.4 . . ? 
C75 C74 C73 121.9(2) . . ? 
C75 C74 H74 119.1 . . ? 
C73 C74 H74 119.1 . . ? 
C74 C75 C76 117.9(2) . . ? 
C74 C75 C78 121.6(2) . . ? 
C76 C75 C78 120.5(2) . . ? 
C77 C76 C75 121.2(2) . . ? 
C77 C76 H76 119.4 . . ? 
C75 C76 H76 119.4 . . ? 
C76 C77 C72 119.4(2) . . ? 
C76 C77 H77 120.3 . . ? 
C72 C77 H77 120.3 . . ? 
C75 C78 H78A 109.5 . . ? 
C75 C78 H78B 109.5 . . ? 
H78A C78 H78B 109.5 . . ? 
C75 C78 H78C 109.5 . . ? 
H78A C78 H78C 109.5 . . ? 
H78B C78 H78C 109.5 . . ? 
O4 S4 C98 106.51(9) . . ? 
O4 S4 C79 105.35(9) . . ? 
C98 S4 C79 97.24(9) . . ? 
C89 N4 C97 117.67(18) . . ? 
C80 C79 C88 122.25(18) . . ? 
C80 C79 S4 120.54(15) . . ? 
C88 C79 S4 117.17(14) . . ? 
C79 C80 C81 118.56(18) . . ? 
C79 C80 C89 122.23(18) . . ? 
C81 C80 C89 119.20(16) . . ? 
C82 C81 C86 118.36(17) . . ? 
C82 C81 C80 122.36(18) . . ? 
C86 C81 C80 119.27(17) . . ? 
C83 C82 C81 120.49(18) . . ? 
C83 C82 H82 119.8 . . ? 
C81 C82 H82 119.8 . . ? 
C82 C83 C84 121.00(18) . . ? 
C82 C83 H83 119.5 . . ? 
C84 C83 H83 119.5 . . ? 
C85 C84 C83 120.29(19) . . ? 
C85 C84 H84 119.9 . . ? 
C83 C84 H84 119.9 . . ? 
C84 C85 C86 120.38(18) . . ? 
C84 C85 H85 119.8 . . ? 
C86 C85 H85 119.8 . . ? 
C85 C86 C87 121.49(18) . . ? 
C85 C86 C81 119.35(17) . . ? 
C87 C86 C81 119.16(17) . . ? 
C88 C87 C86 120.77(18) . . ? 
C88 C87 H87 119.6 . . ? 
C86 C87 H87 119.6 . . ? 
C87 C88 C79 119.81(18) . . ? 
C87 C88 H88 120.1 . . ? 
C79 C88 H88 120.1 . . ? 
N4 C89 C90 123.57(18) . . ? 
N4 C89 C80 115.94(17) . . ? 
C90 C89 C80 120.43(16) . . ? 
C91 C90 C95 119.05(18) . . ? 
C91 C90 C89 123.52(17) . . ? 
C95 C90 C89 117.43(17) . . ? 
C92 C91 C90 120.29(19) . . ? 
C92 C91 H91 119.9 . . ? 
C90 C91 H91 119.9 . . ? 
C91 C92 C93 120.3(2) . . ? 
C91 C92 H92 119.9 . . ? 
C93 C92 H92 119.9 . . ? 
C94 C93 C92 120.8(2) . . ? 
C94 C93 H93 119.6 . . ? 
C92 C93 H93 119.6 . . ? 
C93 C94 C95 120.29(19) . . ? 
C93 C94 H94 119.9 . . ? 
C95 C94 H94 119.9 . . ? 
C96 C95 C94 123.25(19) . . ? 
C96 C95 C90 117.51(18) . . ? 
C94 C95 C90 119.22(19) . . ? 
C97 C96 C95 119.55(19) . . ? 
C97 C96 H96 120.2 . . ? 
C95 C96 H96 120.2 . . ? 
N4 C97 C96 124.05(19) . . ? 
N4 C97 H97 118.0 . . ? 
C96 C97 H97 118.0 . . ? 
C99 C98 C103 120.63(19) . . ? 
C99 C98 S4 119.88(16) . . ? 
C103 C98 S4 119.47(16) . . ? 
C98 C99 C100 119.5(2) . . ? 
C98 C99 H99 120.2 . . ? 
C100 C99 H99 120.2 . . ? 
C99 C100 C101 121.3(2) . . ? 
C99 C100 H100 119.3 . . ? 
C101 C100 H100 119.3 . . ? 
C102 C101 C100 117.91(19) . . ? 
C102 C101 C104 121.4(2) . . ? 
C100 C101 C104 120.7(2) . . ? 
C103 C102 C101 121.2(2) . . ? 
C103 C102 H102 119.4 . . ? 
C101 C102 H102 119.4 . . ? 
C98 C103 C102 119.4(2) . . ? 
C98 C103 H103 120.3 . . ? 
C102 C103 H103 120.3 . . ? 
C101 C104 H10A 109.5 . . ? 
C101 C104 H10B 109.5 . . ? 
H10A C104 H10B 109.5 . . ? 
C101 C104 H10C 109.5 . . ? 
H10A C104 H10C 109.5 . . ? 
H10B C104 H10C 109.5 . . ? 
  
loop_ 
 _geom_torsion_atom_site_label_1 
 _geom_torsion_atom_site_label_2 
 _geom_torsion_atom_site_label_3 
 _geom_torsion_atom_site_label_4 
 _geom_torsion 
 _geom_torsion_site_symmetry_1 
 _geom_torsion_site_symmetry_2 
 _geom_torsion_site_symmetry_3 
 _geom_torsion_site_symmetry_4 
 _geom_torsion_publ_flag 
O1 S1 C1 C2 -151.03(15) . . . . ? 
C20 S1 C1 C2 100.64(16) . . . . ? 
O1 S1 C1 C10 28.47(17) . . . . ? 
C20 S1 C1 C10 -79.87(16) . . . . ? 
C10 C1 C2 C3 3.6(3) . . . . ? 
S1 C1 C2 C3 -176.89(13) . . . . ? 
C10 C1 C2 C11 -170.43(17) . . . . ? 
S1 C1 C2 C11 9.0(3) . . . . ? 
C1 C2 C3 C4 179.82(18) . . . . ? 
C11 C2 C3 C4 -5.9(3) . . . . ? 
C1 C2 C3 C8 -1.0(3) . . . . ? 
C11 C2 C3 C8 173.25(16) . . . . ? 
C8 C3 C4 C5 3.2(3) . . . . ? 
C2 C3 C4 C5 -177.62(18) . . . . ? 
C3 C4 C5 C6 -0.7(3) . . . . ? 
C4 C5 C6 C7 -2.6(3) . . . . ? 
C5 C6 C7 C8 3.1(3) . . . . ? 
C6 C7 C8 C9 179.90(19) . . . . ? 
C6 C7 C8 C3 -0.4(3) . . . . ? 
C4 C3 C8 C9 177.00(17) . . . . ? 
C2 C3 C8 C9 -2.2(3) . . . . ? 
C4 C3 C8 C7 -2.7(3) . . . . ? 
C2 C3 C8 C7 178.15(17) . . . . ? 
C7 C8 C9 C10 -177.37(19) . . . . ? 
C3 C8 C9 C10 3.0(3) . . . . ? 
C8 C9 C10 C1 -0.5(3) . . . . ? 
C2 C1 C10 C9 -2.9(3) . . . . ? 
S1 C1 C10 C9 177.58(15) . . . . ? 
C19 N1 C11 C12 -1.2(3) . . . . ? 
C19 N1 C11 C2 174.85(17) . . . . ? 
C1 C2 C11 N1 72.6(2) . . . . ? 
C3 C2 C11 N1 -101.5(2) . . . . ? 
C1 C2 C11 C12 -111.3(2) . . . . ? 
C3 C2 C11 C12 74.6(2) . . . . ? 
N1 C11 C12 C13 -177.51(18) . . . . ? 
C2 C11 C12 C13 6.7(3) . . . . ? 
N1 C11 C12 C17 3.3(3) . . . . ? 
C2 C11 C12 C17 -172.50(17) . . . . ? 
C17 C12 C13 C14 0.5(3) . . . . ? 
C11 C12 C13 C14 -178.75(19) . . . . ? 
C12 C13 C14 C15 0.5(3) . . . . ? 
C13 C14 C15 C16 -1.1(3) . . . . ? 
C14 C15 C16 C17 0.7(3) . . . . ? 
C15 C16 C17 C18 -179.13(19) . . . . ? 
C15 C16 C17 C12 0.2(3) . . . . ? 
C13 C12 C17 C18 178.56(17) . . . . ? 
C11 C12 C17 C18 -2.2(3) . . . . ? 
C13 C12 C17 C16 -0.8(3) . . . . ? 
C11 C12 C17 C16 178.43(17) . . . . ? 
C16 C17 C18 C19 178.67(19) . . . . ? 
C12 C17 C18 C19 -0.7(3) . . . . ? 
C17 C18 C19 N1 3.0(3) . . . . ? 
C11 N1 C19 C18 -2.0(3) . . . . ? 
O1 S1 C20 C21 158.28(15) . . . . ? 
C1 S1 C20 C21 -92.69(17) . . . . ? 
O1 S1 C20 C25 -20.32(19) . . . . ? 
C1 S1 C20 C25 88.72(17) . . . . ? 
C25 C20 C21 C22 -0.9(3) . . . . ? 
S1 C20 C21 C22 -179.45(15) . . . . ? 
C20 C21 C22 C23 -0.5(3) . . . . ? 
C21 C22 C23 C24 0.8(3) . . . . ? 
C21 C22 C23 C26 -179.76(19) . . . . ? 
C22 C23 C24 C25 0.1(3) . . . . ? 
C26 C23 C24 C25 -179.3(2) . . . . ? 
C23 C24 C25 C20 -1.4(3) . . . . ? 
C21 C20 C25 C24 1.8(3) . . . . ? 
S1 C20 C25 C24 -179.60(16) . . . . ? 
O2 S2 C27 C28 -145.03(15) . . . . ? 
C46 S2 C27 C28 106.45(16) . . . . ? 
O2 S2 C27 C36 34.13(17) . . . . ? 
C46 S2 C27 C36 -74.39(16) . . . . ? 
C36 C27 C28 C29 2.4(3) . . . . ? 
S2 C27 C28 C29 -178.50(14) . . . . ? 
C36 C27 C28 C37 -175.26(17) . . . . ? 
S2 C27 C28 C37 3.9(3) . . . . ? 
C27 C28 C29 C30 -179.91(18) . . . . ? 
C37 C28 C29 C30 -2.2(3) . . . . ? 
C27 C28 C29 C34 -0.7(3) . . . . ? 
C37 C28 C29 C34 177.02(17) . . . . ? 
C34 C29 C30 C31 1.1(3) . . . . ? 
C28 C29 C30 C31 -179.70(19) . . . . ? 
C29 C30 C31 C32 -1.2(3) . . . . ? 
C30 C31 C32 C33 1.1(3) . . . . ? 
C31 C32 C33 C34 -0.9(3) . . . . ? 
C32 C33 C34 C35 -178.1(2) . . . . ? 
C32 C33 C34 C29 0.8(3) . . . . ? 
C30 C29 C34 C33 -0.8(3) . . . . ? 
C28 C29 C34 C33 179.89(18) . . . . ? 
C30 C29 C34 C35 178.02(18) . . . . ? 
C28 C29 C34 C35 -1.2(3) . . . . ? 
C33 C34 C35 C36 -179.62(19) . . . . ? 
C29 C34 C35 C36 1.5(3) . . . . ? 
C34 C35 C36 C27 0.1(3) . . . . ? 
C28 C27 C36 C35 -2.1(3) . . . . ? 
S2 C27 C36 C35 178.74(16) . . . . ? 
C45 N2 C37 C38 -0.6(3) . . . . ? 
C45 N2 C37 C28 179.32(17) . . . . ? 
C27 C28 C37 N2 77.1(2) . . . . ? 
C29 C28 C37 N2 -100.5(2) . . . . ? 
C27 C28 C37 C38 -102.9(2) . . . . ? 
C29 C28 C37 C38 79.4(2) . . . . ? 
N2 C37 C38 C39 -176.50(18) . . . . ? 
C28 C37 C38 C39 3.5(3) . . . . ? 
N2 C37 C38 C43 1.2(3) . . . . ? 
C28 C37 C38 C43 -178.75(16) . . . . ? 
C37 C38 C39 C40 175.67(19) . . . . ? 
C43 C38 C39 C40 -2.0(3) . . . . ? 
C38 C39 C40 C41 3.0(3) . . . . ? 
C39 C40 C41 C42 -1.2(3) . . . . ? 
C40 C41 C42 C43 -1.6(3) . . . . ? 
C41 C42 C43 C44 -175.4(2) . . . . ? 
C41 C42 C43 C38 2.6(3) . . . . ? 
C39 C38 C43 C44 177.39(18) . . . . ? 
C37 C38 C43 C44 -0.4(3) . . . . ? 
C39 C38 C43 C42 -0.8(3) . . . . ? 
C37 C38 C43 C42 -178.56(18) . . . . ? 
C42 C43 C44 C45 177.2(2) . . . . ? 
C38 C43 C44 C45 -0.8(3) . . . . ? 
C43 C44 C45 N2 1.5(3) . . . . ? 
C37 N2 C45 C44 -0.8(3) . . . . ? 
O2 S2 C46 C47 -9.77(19) . . . . ? 
C27 S2 C46 C47 98.63(17) . . . . ? 
O2 S2 C46 C51 169.12(16) . . . . ? 
C27 S2 C46 C51 -82.48(17) . . . . ? 
C51 C46 C47 C48 2.1(3) . . . . ? 
S2 C46 C47 C48 -179.08(15) . . . . ? 
C46 C47 C48 C49 0.2(3) . . . . ? 
C47 C48 C49 C50 -1.1(3) . . . . ? 
C47 C48 C49 C52 179.08(19) . . . . ? 
C48 C49 C50 C51 -0.2(3) . . . . ? 
C52 C49 C50 C51 179.60(19) . . . . ? 
C47 C46 C51 C50 -3.4(3) . . . . ? 
S2 C46 C51 C50 177.75(15) . . . . ? 
C49 C50 C51 C46 2.4(3) . . . . ? 
O3 S3 C53 C54 -139.09(16) . . . . ? 
C72 S3 C53 C54 112.19(16) . . . . ? 
O3 S3 C53 C62 39.53(19) . . . . ? 
C72 S3 C53 C62 -69.19(17) . . . . ? 
C62 C53 C54 C55 4.5(3) . . . . ? 
S3 C53 C54 C55 -176.94(14) . . . . ? 
C62 C53 C54 C63 -172.56(19) . . . . ? 
S3 C53 C54 C63 6.0(3) . . . . ? 
C53 C54 C55 C56 176.04(18) . . . . ? 
C63 C54 C55 C56 -6.9(3) . . . . ? 
C53 C54 C55 C60 -2.7(3) . . . . ? 
C63 C54 C55 C60 174.30(17) . . . . ? 
C60 C55 C56 C57 2.5(3) . . . . ? 
C54 C55 C56 C57 -176.31(18) . . . . ? 
C55 C56 C57 C58 -2.0(3) . . . . ? 
C56 C57 C58 C59 -0.4(3) . . . . ? 
C57 C58 C59 C60 2.1(3) . . . . ? 
C58 C59 C60 C61 177.75(18) . . . . ? 
C58 C59 C60 C55 -1.5(3) . . . . ? 
C56 C55 C60 C61 179.98(17) . . . . ? 
C54 C55 C60 C61 -1.2(3) . . . . ? 
C56 C55 C60 C59 -0.8(3) . . . . ? 
C54 C55 C60 C59 178.07(17) . . . . ? 
C59 C60 C61 C62 -175.63(18) . . . . ? 
C55 C60 C61 C62 3.6(3) . . . . ? 
C60 C61 C62 C53 -2.0(3) . . . . ? 
C54 C53 C62 C61 -2.2(3) . . . . ? 
S3 C53 C62 C61 179.26(15) . . . . ? 
C71 N3 C63 C64 0.1(3) . . . . ? 
C71 N3 C63 C54 -178.08(18) . . . . ? 
C53 C54 C63 N3 75.9(2) . . . . ? 
C55 C54 C63 N3 -101.1(2) . . . . ? 
C53 C54 C63 C64 -102.3(2) . . . . ? 
C55 C54 C63 C64 80.7(2) . . . . ? 
N3 C63 C64 C65 -178.26(19) . . . . ? 
C54 C63 C64 C65 -0.2(3) . . . . ? 
N3 C63 C64 C69 -1.4(3) . . . . ? 
C54 C63 C64 C69 176.63(17) . . . . ? 
C69 C64 C65 C66 -1.8(3) . . . . ? 
C63 C64 C65 C66 175.01(19) . . . . ? 
C64 C65 C66 C67 0.2(3) . . . . ? 
C65 C66 C67 C68 1.1(3) . . . . ? 
C66 C67 C68 C69 -0.7(3) . . . . ? 
C67 C68 C69 C70 -178.0(2) . . . . ? 
C67 C68 C69 C64 -0.8(3) . . . . ? 
C65 C64 C69 C70 179.44(18) . . . . ? 
C63 C64 C69 C70 2.5(3) . . . . ? 
C65 C64 C69 C68 2.1(3) . . . . ? 
C63 C64 C69 C68 -174.89(18) . . . . ? 
C68 C69 C70 C71 174.9(2) . . . . ? 
C64 C69 C70 C71 -2.3(3) . . . . ? 
C63 N3 C71 C70 0.1(3) . . . . ? 
C69 C70 C71 N3 1.1(3) . . . . ? 
O3 S3 C72 C73 -6.12(19) . . . . ? 
C53 S3 C72 C73 103.37(18) . . . . ? 
O3 S3 C72 C77 173.03(17) . . . . ? 
C53 S3 C72 C77 -77.48(18) . . . . ? 
C77 C72 C73 C74 1.9(3) . . . . ? 
S3 C72 C73 C74 -178.96(17) . . . . ? 
C72 C73 C74 C75 1.3(3) . . . . ? 
C73 C74 C75 C76 -2.8(3) . . . . ? 
C73 C74 C75 C78 178.0(2) . . . . ? 
C74 C75 C76 C77 1.1(3) . . . . ? 
C78 C75 C76 C77 -179.7(2) . . . . ? 
C75 C76 C77 C72 2.0(3) . . . . ? 
C73 C72 C77 C76 -3.5(3) . . . . ? 
S3 C72 C77 C76 177.32(15) . . . . ? 
O4 S4 C79 C80 -145.78(16) . . . . ? 
C98 S4 C79 C80 104.83(17) . . . . ? 
O4 S4 C79 C88 32.20(17) . . . . ? 
C98 S4 C79 C88 -77.19(16) . . . . ? 
C88 C79 C80 C81 4.0(3) . . . . ? 
S4 C79 C80 C81 -178.11(13) . . . . ? 
C88 C79 C80 C89 -175.05(17) . . . . ? 
S4 C79 C80 C89 2.8(3) . . . . ? 
C79 C80 C81 C82 -179.62(18) . . . . ? 
C89 C80 C81 C82 -0.5(3) . . . . ? 
C79 C80 C81 C86 -0.4(3) . . . . ? 
C89 C80 C81 C86 178.71(16) . . . . ? 
C86 C81 C82 C83 3.7(3) . . . . ? 
C80 C81 C82 C83 -177.07(18) . . . . ? 
C81 C82 C83 C84 -0.9(3) . . . . ? 
C82 C83 C84 C85 -2.2(3) . . . . ? 
C83 C84 C85 C86 2.4(3) . . . . ? 
C84 C85 C86 C87 -179.50(18) . . . . ? 
C84 C85 C86 C81 0.5(3) . . . . ? 
C82 C81 C86 C85 -3.4(3) . . . . ? 
C80 C81 C86 C85 177.29(17) . . . . ? 
C82 C81 C86 C87 176.53(17) . . . . ? 
C80 C81 C86 C87 -2.7(3) . . . . ? 
C85 C86 C87 C88 -177.66(18) . . . . ? 
C81 C86 C87 C88 2.4(3) . . . . ? 
C86 C87 C88 C79 1.1(3) . . . . ? 
C80 C79 C88 C87 -4.5(3) . . . . ? 
S4 C79 C88 C87 177.59(15) . . . . ? 
C97 N4 C89 C90 -2.3(3) . . . . ? 
C97 N4 C89 C80 174.79(17) . . . . ? 
C79 C80 C89 N4 70.5(2) . . . . ? 
C81 C80 C89 N4 -108.5(2) . . . . ? 
C79 C80 C89 C90 -112.3(2) . . . . ? 
C81 C80 C89 C90 68.7(2) . . . . ? 
N4 C89 C90 C91 -174.89(18) . . . . ? 
C80 C89 C90 C91 8.1(3) . . . . ? 
N4 C89 C90 C95 4.8(3) . . . . ? 
C80 C89 C90 C95 -172.25(17) . . . . ? 
C95 C90 C91 C92 0.7(3) . . . . ? 
C89 C90 C91 C92 -179.61(18) . . . . ? 
C90 C91 C92 C93 0.2(3) . . . . ? 
C91 C92 C93 C94 -0.2(3) . . . . ? 
C92 C93 C94 C95 -0.7(3) . . . . ? 
C93 C94 C95 C96 -177.00(19) . . . . ? 
C93 C94 C95 C90 1.6(3) . . . . ? 
C91 C90 C95 C96 177.06(18) . . . . ? 
C89 C90 C95 C96 -2.6(3) . . . . ? 
C91 C90 C95 C94 -1.6(3) . . . . ? 
C89 C90 C95 C94 178.70(18) . . . . ? 
C94 C95 C96 C97 177.08(19) . . . . ? 
C90 C95 C96 C97 -1.6(3) . . . . ? 
C89 N4 C97 C96 -2.3(3) . . . . ? 
C95 C96 C97 N4 4.3(3) . . . . ? 
O4 S4 C98 C99 163.83(16) . . . . ? 
C79 S4 C98 C99 -87.75(18) . . . . ? 
O4 S4 C98 C103 -14.68(18) . . . . ? 
C79 S4 C98 C103 93.74(17) . . . . ? 
C103 C98 C99 C100 -1.9(3) . . . . ? 
S4 C98 C99 C100 179.66(16) . . . . ? 
C98 C99 C100 C101 -0.1(3) . . . . ? 
C99 C100 C101 C102 1.1(3) . . . . ? 
C99 C100 C101 C104 -179.0(2) . . . . ? 
C100 C101 C102 C103 -0.2(3) . . . . ? 
C104 C101 C102 C103 179.8(2) . . . . ? 
C99 C98 C103 C102 2.7(3) . . . . ? 
S4 C98 C103 C102 -178.81(16) . . . . ? 
C101 C102 C103 C98 -1.6(3) . . . . ? 
  
_diffrn_measured_fraction_theta_max    0.980 
_diffrn_reflns_theta_full              26.38 
_diffrn_measured_fraction_theta_full   0.980 
_refine_diff_density_max    0.380 
_refine_diff_density_min   -0.183 
_refine_diff_density_rms    0.041 
